# Supplementary figures and images for: Metabolomic Profiling of Portal Blood and Bile Reveals Metabolic Signatures of Primary Sclerosing Cholangitis
Source: MDPI journal article supplement (doi:10.3390/ijms19103188), 2018-10-16

# Figure S1

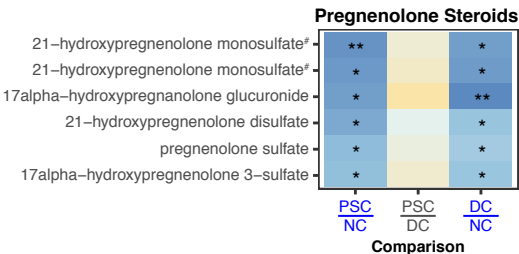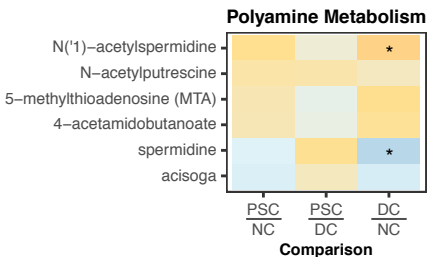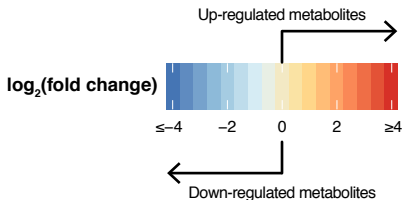

# Figure S2

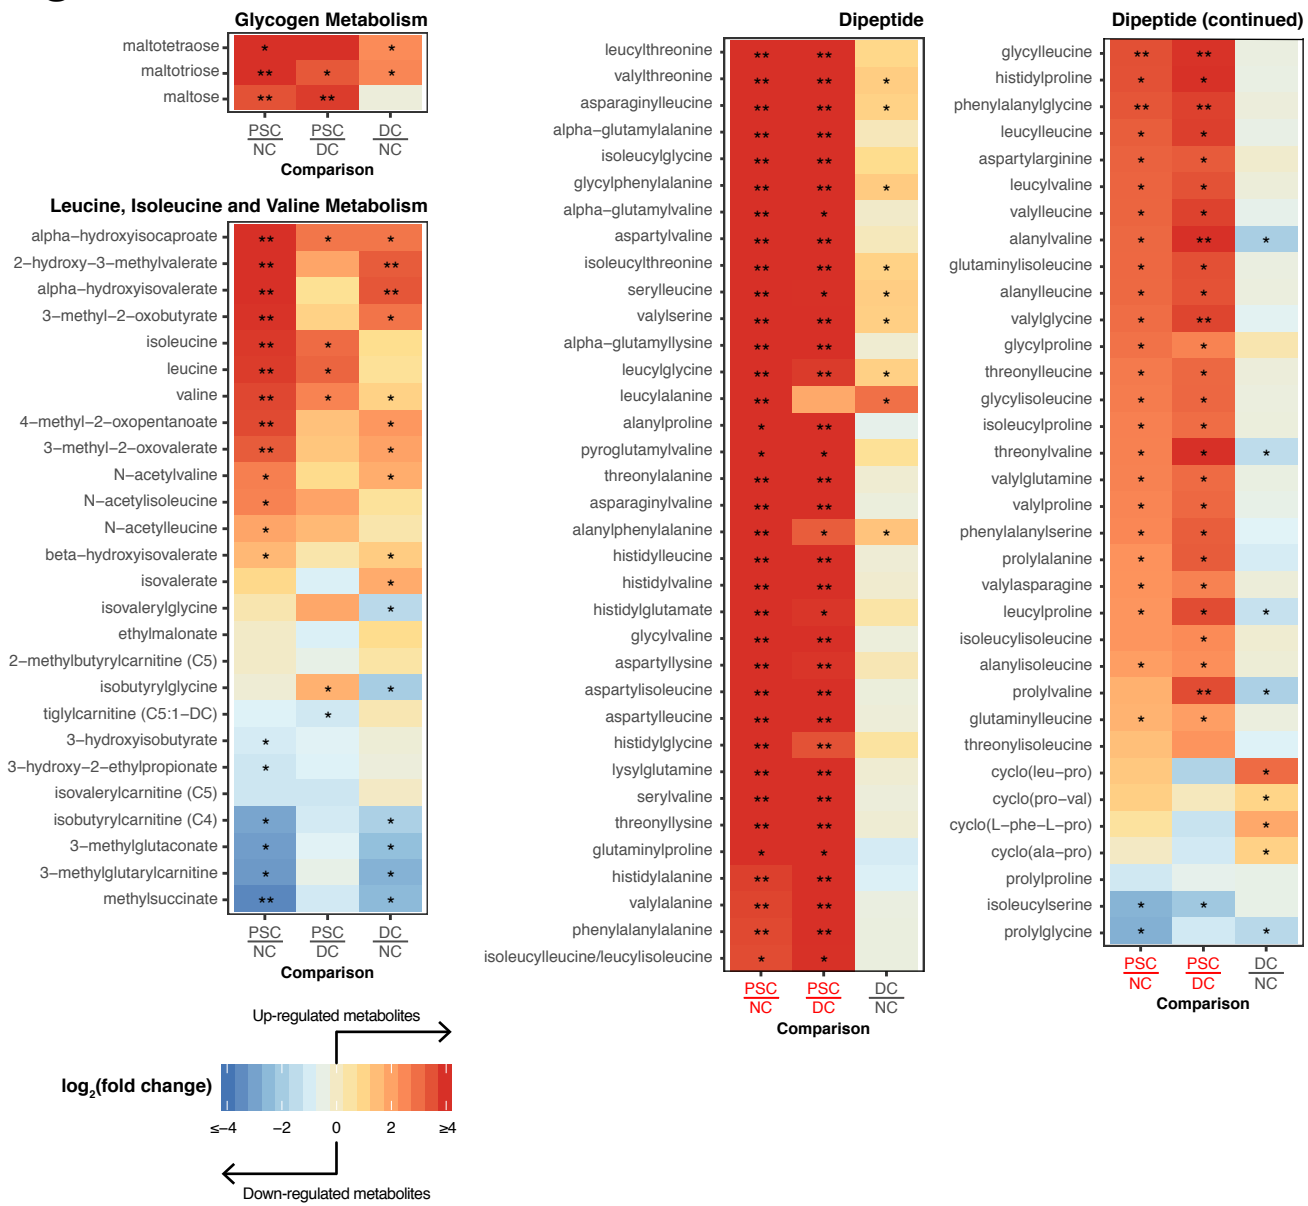

Supplement: s1 [file s1]
